# Supplementary material
Source: PubMed Central journal article supplement (PMC1189312)

**BMAL1**

**B2M**

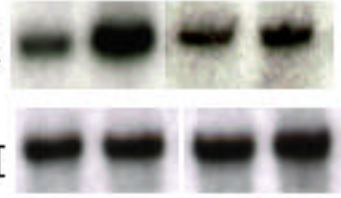

**undifferentiated cells**

**adipose cells**

**chondroblast cells**

**osteoblast cells**

Supplement: pnas_0502383102_1.pdf [file pnas_0502383102_1.pdf]

(A)

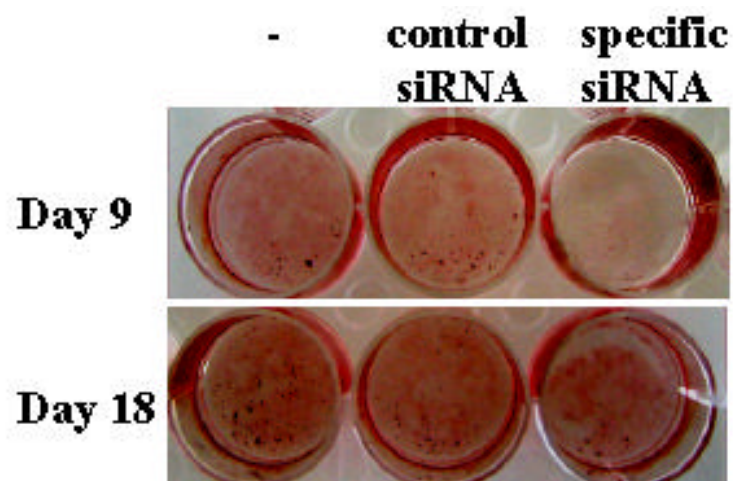

(B)

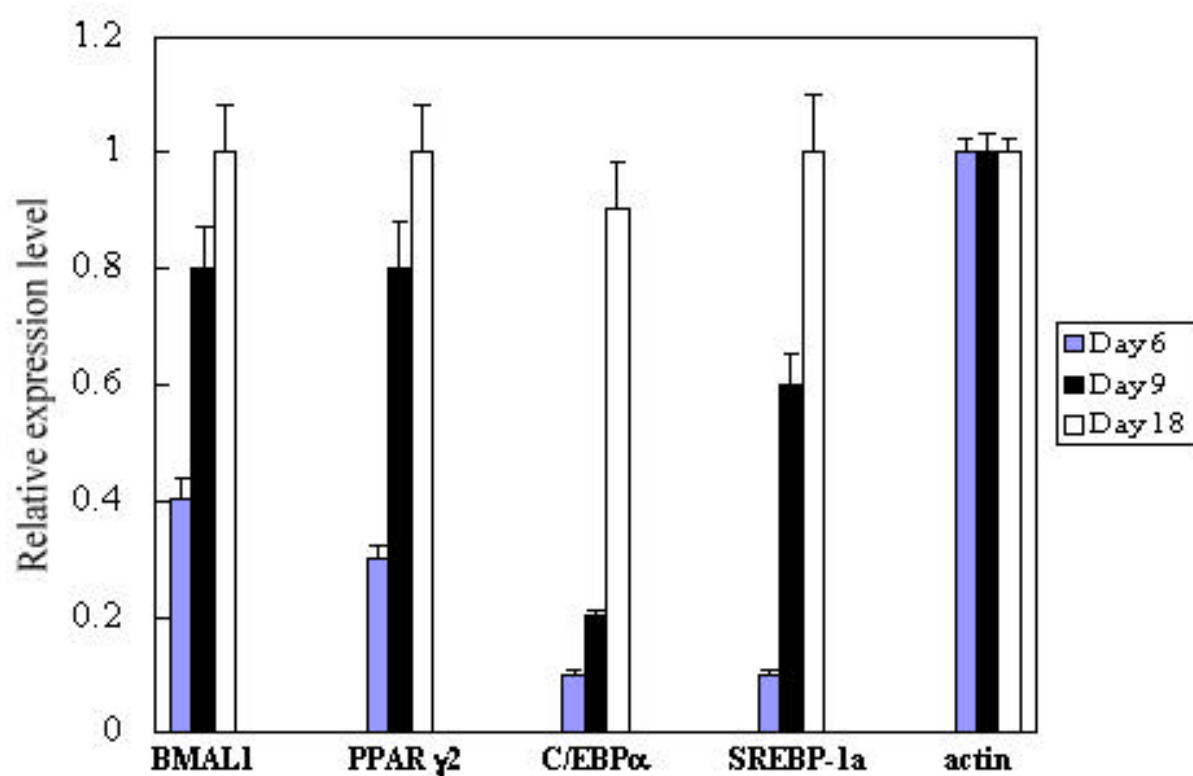

Supplement: pnas_0502383102_2.pdf [file pnas_0502383102_2.pdf]

(A)

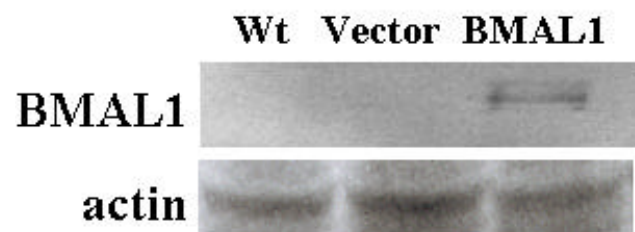

(C)

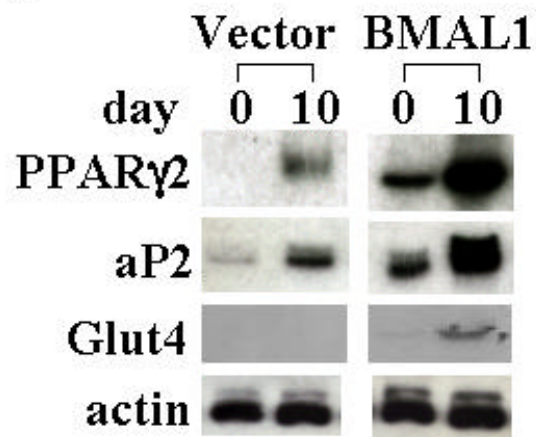

(B)

Pioglitazone ETYA

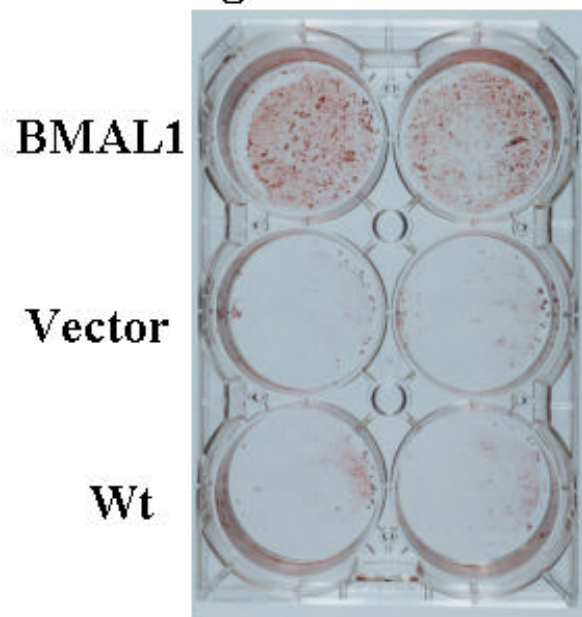

Supplement: pnas_0502383102_3.pdf [file pnas_0502383102_3.pdf]

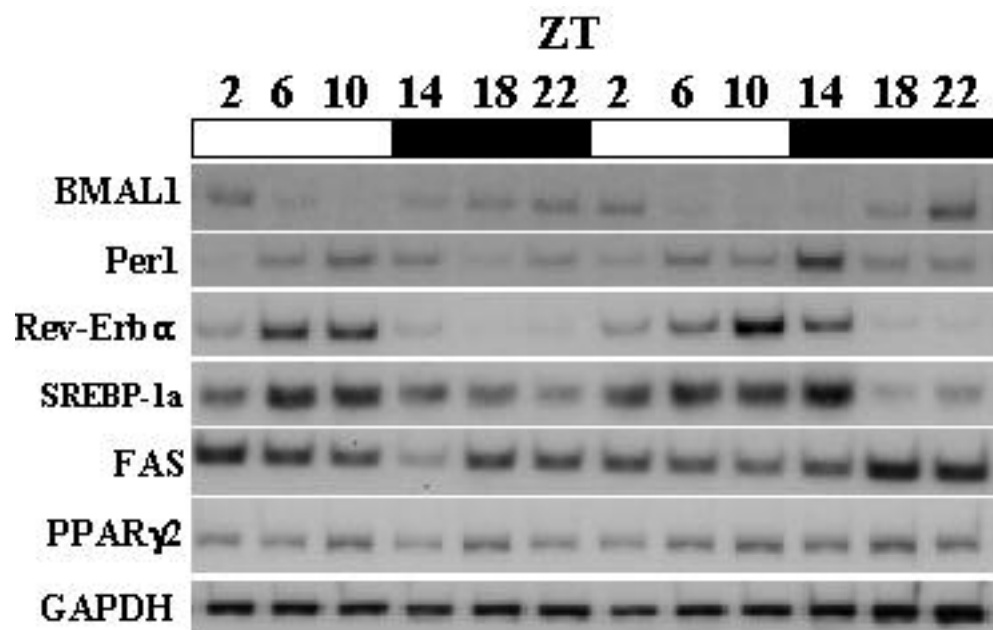

Supplement: pnas_0502383102_4.pdf [file pnas_0502383102_4.pdf]
